# Supplementary material for: Physical activity levels in adults with intellectual disabilities: A systematic review
Source: PubMed Central journal article supplement — Prev Med Rep. 2016 Jun 8;4:209–19. doi: 10.1016/j.pmedr.2016.06.008 (PMC4929079; doi:10.1016/j.pmedr.2016.06.008), 2016-06-08
Supplement: mmc3.pdf [file mmc3.pdf]

Print Search History

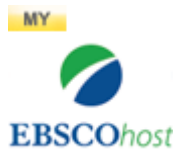

Tuesday, May 31, 2016 10:42:43 AM

| #  | Query                                                                                                                  | Limiters/Expanders                                                                                     | Last Run Via                                                                                      | Results |
|----|------------------------------------------------------------------------------------------------------------------------|--------------------------------------------------------------------------------------------------------|---------------------------------------------------------------------------------------------------|---------|
| S7 | S1 AND S6                                                                                                              | Limiters - English Language; Human; Age Related: All Adult: 19+ years<br>Search modes - Boolean/Phrase | Interface - EBSCOhost Research Databases<br>Search Screen - Advanced Search<br>Database - MEDLINE | 575     |
| S6 | S2 OR S3                                                                                                               | Expanders - Apply related words<br>Search modes - Find all my search terms                             | Interface - EBSCOhost Research Databases<br>Search Screen - Advanced Search<br>Database - MEDLINE | 344,047 |
| S5 | S1 AND S4                                                                                                              | Limiters - English Language; Human; Age Related: All Adult: 19+ years<br>Search modes - Boolean/Phrase | Interface - EBSCOhost Research Databases<br>Search Screen - Advanced Search<br>Database - MEDLINE | 575     |
| S4 | S2 OR S3                                                                                                               | Search modes - Boolean/Phrase                                                                          | Interface - EBSCOhost Research Databases<br>Search Screen - Advanced Search<br>Database - MEDLINE | 313,226 |
| S3 | "motor activity level" or "motor activity measurement" or "physical activity level" or "physical activity measurement" | Limiters - English Language; Human<br>Expanders - Apply related words<br>Search modes - Boolean/Phrase | Interface - EBSCOhost Research Databases<br>Search Screen - Advanced Search<br>Database - MEDLINE | 2,188   |
| S2 | physical activit* or exercis* or sport or motor activit* or Exertion or                                                | Limiters - English Language; Human<br>Expanders - Apply related                                        | Interface - EBSCOhost Research Databases<br>Search Screen - Advanced                              | 344,047 |

|    |                                                                                                                                                                |                                                                                                                                                                                                                                                |                                                                                                        |         |
|----|----------------------------------------------------------------------------------------------------------------------------------------------------------------|------------------------------------------------------------------------------------------------------------------------------------------------------------------------------------------------------------------------------------------------|--------------------------------------------------------------------------------------------------------|---------|
|    | "Physical fitness" or<br>"Exercise therapy"                                                                                                                    | words<br>Search modes -<br>Boolean/Phrase                                                                                                                                                                                                      | Search<br>Database - MEDLINE                                                                           |         |
| S1 | intellectual* disab* or<br>learning disab* or mental*<br>deficien* or mental*<br>disab* or mental*<br>handicap* or mental*<br>retard* or mental*<br>subnormal* | Limiters - English<br>Language; Primary<br>Research Articles; Peer<br>Reviewed; Age Groups: All<br>Adult; Human<br>Expanders - Apply related<br>words; Also search within<br>the full text of the articles<br>Search modes -<br>Boolean/Phrase | Interface - EBSCOhost Research<br>Databases<br>Search Screen - Advanced<br>Search<br>Database - CINAHL | Display |
